# Supplementary material
Source: publisher figshare collection journal article supplement (https://springernature.figshare.com/ndownloader/files/22519460)
Supplement: Supplementary file 1 [file 22519460]

Measurement(s),Demographics • Vital Signs Measurement • Medication • clinical laboratory measurement • fluid balance • length of hospital stay • survival time • microbiological information
Technology Type(s),digital curation
Sample Characteristic - Organism,Homo sapiens
Sample Characteristic - Environment,Intensive Care Unit
Sample Characteristic - Location,China
